# Supplementary material for: In the Search for Biomarkers of Pulmonary Arterial Hypertension, Are Cytokines IL-2, IL-4, IL-6, IL-10, and IFN-Gamma the Right Indicators to Use?
Source: MDPI journal article supplement (doi:10.3390/ijms241813694), 2023-09-05
Supplement: s1 [file s1]

**Supplementary materials Table S1.** Analysis of cytokine concentration in patients with CTEPH, CHD, CTD, IPAH in relation to healthy individuals.

| Type of PAH        |                | Cytokine concentration [pg/ml] |                      |                        |                       |                      |
|--------------------|----------------|--------------------------------|----------------------|------------------------|-----------------------|----------------------|
|                    |                | IL-2                           | IL-4                 | IL-6                   | IL-10                 | IFN- $\gamma$        |
| CTEPH              | Mean $\pm$ SD  | 8.14 $\pm$ 0.44                | 2.87 $\pm$ 0.19      | 23.86 $\pm$ 6.47       | 6.93 $\pm$ 0.71       | 5.34 $\pm$ 0.18      |
|                    | Median (range) | 7.89<br>(7.74-8.82)            | 2.86<br>(2.61-3.21)  | 22.16<br>(11.12-31.23) | 7.07<br>(5.93-7.99)   | 5.35<br>(5.06-5.57)  |
| CHD                | Mean $\pm$ SD  | 29.16 $\pm$ 9.67               | 6.09 $\pm$ 2.81      | 18.96 $\pm$ 8.51       | 19.84 $\pm$ 5.61      | 4.37 $\pm$ 2.06      |
|                    | Median (range) | 26.66<br>(16.30-50.12)         | 5.89<br>(1.67-12.24) | 17.90<br>(9.35-30.46)  | 14.65<br>(3.95-35.30) | 4.26<br>(0.40-10.03) |
| CTD                | Mean $\pm$ SD  | 5.82 $\pm$ 1.03                | 5.89 $\pm$ 2.56      | 33.10 $\pm$ 13.08      | 11.00 $\pm$ 1.56      | 4.88 $\pm$ 0.13      |
|                    | Median (range) | 6.09<br>(4.30-6.91)            | 4.69<br>(3.23-14.33) | 30.97<br>(10.57-40.88) | 10.68<br>(8.76-13.66) | 4.93<br>(4.63-5.05)  |
| IPAH               | Mean $\pm$ SD  | 32.19 $\pm$ 8.32               | 2.57 $\pm$ 0.67      | 46.66 $\pm$ 10.47      | 5.72 $\pm$ 3.78       | 9.20 $\pm$ 3.26      |
|                    | Median (range) | 23.80<br>(9.39-50.12)          | 1.74<br>(0.64-9.24)  | 45.96<br>(12.30-60.30) | 4.91<br>(2.07-15.71)  | 8.04<br>(5.58-23.30) |
| Healthy volunteers | Mean $\pm$ SD  | 2.76 $\pm$ 1.00                | 4.80 $\pm$ 0.31      | 4.13 $\pm$ 2.11        | 4.06 $\pm$ 1.02       | 2.38 $\pm$ 1.19      |
|                    | Median (range) | 2.36<br>(0.48-7.16)            | 4.67<br>(4.29-5.31)  | 3.17<br>(0.15-17.20)   | 4.08<br>(2.77-6.16)   | 2.34<br>(0.61-4.38)  |
| <i>p-value</i>     |                | 0.000*                         | 0.000*               | 0.000*                 | 0.000*                | 0.000*               |
| <i>p-value</i>     | HV vs. CTEPH   | 0.000*                         | 0.000*               | 0.000*                 | 0.000*                | 0.072*               |
|                    | CTEPH vs. CHD  | 0.000*                         | 0.000*               | 0.031*                 | 0.000*                | 0.124                |
|                    | CTEPH vs. CTD  | 0.032*                         | 0.000*               | 0.028*                 | 0.017*                | 0.277                |
|                    | CTEPH vs. IPAH | 0.000*                         | 0.000*               | 0.000*                 | 0.000*                | 0.000*               |
|                    | HV vs. CHD     | 0.000*                         | 0.027*               | 0.000*                 | 0.000*                | 0.000*               |
|                    | CHD vs. CTD    | 0.000*                         | 0.048*               | 0.000*                 | 0.011*                | 0.312                |
|                    | CHD vs. IPAH   | 0.043*                         | 0.000*               | 0.000*                 | 0.000*                | 0.000*               |
|                    | HV vs. CTD     | 0.000*                         | 0.973                | 0.000*                 | 0.000*                | 0.000*               |
|                    | CTD vs. IPAH   | 0.000*                         | 0.000*               | 0.013*                 | 0.000*                | 0.000*               |
|                    | HV vs. IPAH    | 0.000*                         | 0.000*               | 0.000*                 | 0.142                 | 0.000*               |

Statistically significant results are marked with \*.

**Supplementary materials Table S2.** Sperman rank correlation analysis for patients with CHD

| Parameters                                           | R       | t(N-2)  | p-value |
|------------------------------------------------------|---------|---------|---------|
| Wiek & Lym [10 <sup>3</sup> /mm <sup>3</sup> ]       | -0 .647 | -4 .156 | 0 .000  |
| Wiek & RVSP [mmHg]                                   | -0 .644 | -4 .124 | 0 .000  |
| Wiek & HGB [g/dl]                                    | -0 .604 | -3 .710 | 0 .001  |
| Wiek & PASP [mmHg]                                   | -0 .572 | -3 .415 | 0 .002  |
| Wiek & mPAP [mmHg]                                   | -0 .565 | -3 .353 | 0 .003  |
| HGB [g/dl] & PLT [10 <sup>3</sup> /mm <sup>3</sup> ] | -0 .463 | -2 .561 | 0 .017  |
| Wiek & PVR dyne/s/cm-5]                              | -0 .456 | -2 .509 | 0 .019  |
| 6MWT [m] & CO [L/min.]                               | -0 .428 | -2 .269 | 0 .033  |
| NT-proBNP [pg/ml] & HGB [g/dl]                       | -0 .419 | -2 .263 | 0 .033  |
| BMI & 6MWT [m]                                       | -0 .413 | -2 .178 | 0 .040  |
| IL-2 [pg/ml] & NK                                    | -0 .413 | -2 .224 | 0 .036  |
| CI [L/min/m2] & Mean pressure in the right ventricle | -0 .412 | -2 .217 | 0 .036  |

|                                                    |        |        |       |
|----------------------------------------------------|--------|--------|-------|
| [mmHg]                                             |        |        |       |
| Wiek & 6MWT [m]                                    | -0.397 | -2.072 | 0.050 |
| PVR dyne/s/cm-5] & HGB [g/dl]                      | 0.400  | 2.140  | 0.043 |
| 6MWT [m] & mPAP [mmHg]                             | 0.414  | 2.179  | 0.040 |
| CD45 & CD4                                         | 0.454  | 2.499  | 0.020 |
| CD4 & CD3                                          | 0.454  | 2.499  | 0.020 |
| 6MWT [m] & HGB [g/dl]                              | 0.457  | 2.464  | 0.022 |
| PLT [ $10^3/\text{mm}^3$ ] & IFN- $\gamma$ [pg/ml] | 0.462  | 2.551  | 0.018 |
| PVR dyne/s/cm-5] & Lym [ $10^3/\text{mm}^3$ ]      | 0.469  | 2.600  | 0.016 |
| 6MWT [m] & PASP [mmHg]                             | 0.469  | 2.546  | 0.018 |
| CO [L/min.] & IL-10 [pg/ml]                        | 0.471  | 2.615  | 0.015 |
| PLT [ $10^3/\text{mm}^3$ ] & Wiek                  | 0.492  | 2.768  | 0.011 |
| PVR dyne/s/cm-5] & 6MWT [m]                        | 0.497  | 2.745  | 0.012 |
| CD19 & CD4/CD8                                     | 0.516  | 2.954  | 0.007 |
| HGB [g/dl] & IL-2 [pg/ml]                          | 0.518  | 2.964  | 0.007 |
| 6MWT [m] & RVSP [mmHg]                             | 0.533  | 3.025  | 0.006 |
| NT-proBNP [pg/ml] & IL-4 [pg/ml]                   | 0.535  | 3.103  | 0.005 |
| NT-proBNP [pg/ml] & IL-10 [pg/ml]                  | 0.540  | 3.142  | 0.004 |
| PASP [mmHg] & Lym [ $10^3/\text{mm}^3$ ]           | 0.612  | 3.789  | 0.001 |
| PVR dyne/s/cm-5] & RVSP [mmHg]                     | 0.642  | 4.107  | 0.000 |
| RVSP [mmHg] & Lym [ $10^3/\text{mm}^3$ ]           | 0.643  | 4.112  | 0.000 |
| Lym [ $10^3/\text{mm}^3$ ] & HGB [g/dl]            | 0.654  | 4.230  | 0.000 |
| PVR dyne/s/cm-5] & PASP [mmHg]                     | 0.660  | 4.307  | 0.000 |
| PASP [mmHg] & HGB [g/dl]                           | 0.670  | 4.425  | 0.000 |
| mPAP [mmHg] & HGB [g/dl]                           | 0.672  | 4.448  | 0.000 |
| RVSP [mmHg] & HGB [g/dl]                           | 0.719  | 5.068  | 0.000 |
| CD4 & CD4/CD8                                      | 0.740  | 5.393  | 0.000 |
| mPAP [mmHg] & RVSP [mmHg]                          | 0.744  | 5.454  | 0.000 |
| mPAP [mmHg] & PASP [mmHg]                          | 0.763  | 5.780  | 0.000 |
| mPAP [mmHg] & Lym [ $10^3/\text{mm}^3$ ]           | 0.790  | 6.318  | 0.000 |
| PVR dyne/s/cm-5] & mPAP [mmHg]                     | 0.793  | 6.369  | 0.000 |
| CD45 & CD8                                         | 0.826  | 7.188  | 0.000 |
| CD8 & CD3                                          | 0.826  | 7.188  | 0.000 |
| CI [L/min/m <sup>2</sup> ] & CO [L/min.]           | 0.890  | 9.586  | 0.000 |
| PASP [mmHg] & RVSP [mmHg]                          | 0.961  | 16.962 | 0.000 |

Supplementary materials Table S3 Sperman rank correlation analysis for patients with CTD

| Parameters                           | R      | t(N-2) | p-value |
|--------------------------------------|--------|--------|---------|
| Wiek & PLT [ $10^3/\text{mm}^3$ ]    | -0.916 | -6.040 | 0.001   |
| IL-2 [pg/ml] & IL-4 [pg/ml]          | -0.833 | -3.989 | 0.005   |
| IL-4 [pg/ml] & IFN- $\gamma$ [pg/ml] | -0.833 | -3.989 | 0.005   |
| IL-2 [pg/ml] & IL-4 [pg/ml]          | -0.833 | -3.989 | 0.005   |
| IL-4 [pg/ml] & IFN- $\gamma$ [pg/ml] | -0.833 | -3.989 | 0.005   |
| CD19 & NK                            | -0.733 | -2.854 | 0.025   |
| Wiek & mPAP [mmHg]                   | -0.713 | -2.687 | 0.031   |

|                                                       |        |         |        |
|-------------------------------------------------------|--------|---------|--------|
| PVR dyne/s/cm-5] & RVSP [mmHg]                        | 0 .672 | 2 .404  | 0 .047 |
| mPAP [mmHg] & PLT [10 <sup>3</sup> /mm <sup>3</sup> ] | 0 .678 | 2 .442  | 0 .045 |
| CD8 & CD19                                            | 0 .683 | 2 .476  | 0 .042 |
| mPAP [mmHg] & RVSP [mmHg]                             | 0 .694 | 2 .553  | 0 .038 |
| CD45 & CD19                                           | 0 .700 | 2 .593  | 0 .036 |
| CD19 & CD3                                            | 0 .700 | 2 .593  | 0 .036 |
| PVR dyne/s/cm-5] & IL-6 [pg/ml]                       | 0 .717 | 2 .719  | 0 .030 |
| IL-4 [pg/ml] & CD8                                    | 0 .750 | 3 .000  | 0 .020 |
| CD4 & CD4/CD8                                         | 0 .750 | 3 .000  | 0 .020 |
| CD4 & CD19                                            | 0 .750 | 3 .000  | 0 .020 |
| mPAP [mmHg] & IL-6 [pg/ml]                            | 0 .804 | 3 .573  | 0 .009 |
| IL-4 [pg/ml] & IL-10 [pg/ml]                          | 0 .833 | 3 .989  | 0 .005 |
| IL-4 [pg/ml] & CD19                                   | 0 .850 | 4 .269  | 0 .004 |
| CD45 & CD4                                            | 0 .850 | 4 .269  | 0 .004 |
| CD4 & CD3                                             | 0 .850 | 4 .269  | 0 .004 |
| PASP [mmHg] & IL-4 [pg/ml]                            | 0 .863 | 4 .511  | 0 .003 |
| PVR dyne/s/cm-5] & mPAP [mmHg]                        | 0 .975 | 11 .533 | 0 .000 |
| CI [L/min/m <sup>2</sup> ] & CO [L/min.]              | 0 .983 | 14 .248 | 0 .000 |

Supplementary materials Table S4 Sperman rank correlation analysis for patients with CTEPH

| Parameters                                                  | R       | t(N-2)   | p-value |
|-------------------------------------------------------------|---------|----------|---------|
| CD8 & CD4/CD8                                               | -0 .964 | -10 .200 | 0 .000  |
| CD4 & CD8                                                   | -0 .903 | -5 .946  | 0 .000  |
| mPAP [mmHg] & Lym [10 <sup>3</sup> /mm <sup>3</sup> ]       | -0 .874 | -4 .758  | 0 .002  |
| IL-10 [pg/ml] & Lym [10 <sup>3</sup> /mm <sup>3</sup> ]     | -0 .729 | -3 .017  | 0 .017  |
| Lym [10 <sup>3</sup> /mm <sup>3</sup> ] & PASP [mmHg]       | -0 .728 | -2 .810  | 0 .026  |
| IL-2 [pg/ml] & mPAP [mmHg]                                  | -0 .669 | -2 .384  | 0 .049  |
| IL-4 [pg/ml] & mPAP [mmHg]                                  | -0 .669 | -2 .384  | 0 .049  |
| IL-10 [pg/ml] & Mean pressure in the right ventricle [mmHg] | -0 .669 | -2 .384  | 0 .049  |
| CD45 & NK                                                   | 0 .636  | 2 .333   | 0 .048  |
| NK & CD3                                                    | 0 .636  | 2 .333   | 0 .048  |
| IL-6 [pg/ml] & NK                                           | 0 .661  | 2 .489   | 0 .038  |
| CD45 & CD8                                                  | 0 .661  | 2 .489   | 0 .038  |
| CD8 & CD3                                                   | 0 .661  | 2 .489   | 0 .038  |
| NK & IL-6 [pg/ml]                                           | 0 .661  | 2 .489   | 0 .038  |
| IL-6 [pg/ml] & PVR dyne/s/cm-5]                             | 0 .667  | 2 .366   | 0 .050  |
| IL-2 [pg/ml] & Mean pressure in the right ventricle [mmHg]  | 0 .669  | 2 .384   | 0 .049  |
| IL-4 [pg/ml] & Mean pressure in the right ventricle [mmHg]  | 0 .669  | 2 .384   | 0 .049  |
| IL-10 [pg/ml] & mPAP [mmHg]                                 | 0 .669  | 2 .384   | 0 .049  |
| BMI & CO [L/min.]                                           | 0 .683  | 2 .476   | 0 .042  |

|                                                        |        |        |        |
|--------------------------------------------------------|--------|--------|--------|
| IL-6 [pg/ml] & CD45                                    | 0 .697 | 2 .749 | 0 .025 |
| CD3 & IL-6 [pg/ml]                                     | 0 .697 | 2 .749 | 0 .025 |
| IL-2 [pg/ml] & Lym [10 <sup>3</sup> /mm <sup>3</sup> ] | 0 .729 | 3 .017 | 0 .017 |
| IL-4 [pg/ml] & Lym [10 <sup>3</sup> /mm <sup>3</sup> ] | 0 .729 | 3 .017 | 0 .017 |
| IFN- $\gamma$ [pg/ml] & BMI                            | 0 .791 | 3 .663 | 0 .006 |
| CI [L/min/m <sup>2</sup> ] & CO [L/min.]               | 0 .867 | 4 .596 | 0 .002 |
| mPAP [mmHg] & RVSP [mmHg]                              | 0 .870 | 4 .675 | 0 .002 |
| CD4 & CD4/CD8                                          | 0 .903 | 5 .946 | 0 .000 |
| mPAP [mmHg] & PASP [mmHg]                              | 0 .929 | 6 .635 | 0 .000 |
| PASP [mmHg] & RVSP [mmHg]                              | 0 .967 | 9 .989 | 0 .000 |

Supplementary materials Table S5 Sperman rank correlation analysis for patients with IPAH

| Parameters                                                 | R       | t(N-2)  | p-value |
|------------------------------------------------------------|---------|---------|---------|
| PVR dyne/s/cm-5] & CO [L/min.]                             | -0 .649 | -4 .096 | 0 .000  |
| PVR dyne/s/cm-5] & CI [L/min/m <sup>2</sup> ]              | -0 .592 | -3 .522 | 0 .002  |
| Wiek & 6MWT [m]                                            | -0 .584 | -3 .452 | 0 .002  |
| CI [L/min/m <sup>2</sup> ] & IL-10 [pg/ml]                 | -0 .489 | -2 .685 | 0 .013  |
| IL-4 [pg/ml] & IFN- $\gamma$ [pg/ml]                       | -0 .485 | -2 .657 | 0 .014  |
| IL-4 [pg/ml] & IFN- $\gamma$ [pg/ml]                       | -0 .485 | -2 .657 | 0 .014  |
| Wiek & IL-2 [pg/ml]                                        | -0 .469 | -2 .549 | 0 .018  |
| IL-6 [pg/ml] & CD19                                        | -0 .466 | -2 .527 | 0 .019  |
| Mean pressure in the right ventricle [mmHg] & IL-2 [pg/ml] | -0 .462 | -2 .498 | 0 .020  |
| CO [L/min.] & IL-2 [pg/ml]                                 | -0 .432 | -2 .295 | 0 .031  |
| CO [L/min.] & IL-10 [pg/ml]                                | -0 .429 | -2 .280 | 0 .032  |
| Wiek & mPAP [mmHg]                                         | -0 .426 | -2 .260 | 0 .034  |
| Wiek & PASP [mmHg]                                         | -0 .416 | -2 .193 | 0 .039  |
| NT-proBNP [pg/ml] & IL-10 [pg/ml]                          | -0 .402 | -2 .106 | 0 .046  |
| PVR dyne/s/cm-5] & IL-6 [pg/ml]                            | 0 .406  | 2 .131  | 0 .044  |
| CD45 & CD4/CD8                                             | 0 .435  | 2 .319  | 0 .030  |
| CD3 & CD4/CD8                                              | 0 .435  | 2 .319  | 0 .030  |
| CO [L/min.] & IFN- $\gamma$ [pg/ml]                        | 0 .438  | 2 .338  | 0 .028  |
| PVR dyne/s/cm-5] & IL-2 [pg/ml]                            | 0 .444  | 2 .375  | 0 .026  |
| IL-10 [pg/ml] & CD4/CD8                                    | 0 .444  | 2 .375  | 0 .026  |
| CD8 & CD19                                                 | 0 .465  | 2 .516  | 0 .019  |
| Mean pressure in the right ventricle [mmHg] & mPAP [mmHg]  | 0 .470  | 2 .555  | 0 .018  |
| IL-10 [pg/ml] & CD4                                        | 0 .475  | 2 .591  | 0 .016  |
| CD4 & CD8                                                  | 0 .477  | 2 .602  | 0 .016  |
| 6MWT [m] & RVSP [mmHg]                                     | 0 .518  | 2 .901  | 0 .008  |
| mPAP [mmHg] & IL-6 [pg/ml]                                 | 0 .539  | 3 .066  | 0 .005  |
| 6MWT [m] & PASP [mmHg]                                     | 0 .568  | 3 .309  | 0 .003  |
| CI [L/min/m <sup>2</sup> ] & IFN- $\gamma$ [pg/ml]         | 0 .581  | 3 .423  | 0 .002  |
| CD45 & CD19                                                | 0 .613  | 3 .722  | 0 .001  |
| CD19 & CD3                                                 | 0 .613  | 3 .722  | 0 .001  |
| CD4/CD8 & CD19                                             | 0 .693  | 4 .611  | 0 .000  |

|                                |        |         |        |
|--------------------------------|--------|---------|--------|
| CD4 & CD19                     | 0 .703 | 4 .742  | 0 .000 |
| PVR dyne/s/cm-5] & mPAP [mmHg] | 0 .724 | 5 .036  | 0 .000 |
| CD45 & CD4                     | 0 .812 | 6 .680  | 0 .000 |
| CD3 & CD4                      | 0 .812 | 6 .680  | 0 .000 |
| CD4 & CD4/CD8                  | 0 .816 | 6 .774  | 0 .000 |
| CD45 & CD8                     | 0 .838 | 7 .379  | 0 .000 |
| CD3 & CD8                      | 0 .838 | 7 .379  | 0 .000 |
| CI [L/min/m2] & CO [L/min.]    | 0 .869 | 8 .432  | 0 .000 |
| PASP [mmHg] & RVSP [mmHg]      | 0 .982 | 25 .057 | 0 .000 |
